# Supplementary material for: A thalamic-hippocampal CA1 signal for contextual fear memory suppression, extinction, and discrimination
Source: Nat Commun. 2023 Oct 24;14:6758. doi: 10.1038/s41467-023-42429-6 (PMC10598272; doi:10.1038/s41467-023-42429-6)
Supplement: Supplementary file 4 — Source Data [file 41467_2023_42429_MOESM4_ESM.xlsx]

## Sheet: Figure 1
Figure 1
	Figure 1c					Figure 1e						Figure 1h			Figure 1i					Figure 1j
	Adjusted Frame (x axis)	Standard deviation	Mean velocity				context	Mean freezing	Standard deviation			Percent	count		Percent (control)	count (control)	Percent (shocked)	count (shocked)		day	name	context	mean velocity
	-60	17.6236	9.81796			Retrieval day 1	shocked	0.344649	0.150434			0.03174	235		0.015794	58	0.015794	191		pre-shocks	A1	shocked	0.395926
	-59	17.5999	9.6348			Retrieval day 2	shocked	0.296188	0.1514			0.047686	124		0.03174	52	0.03174	55		pre-shocks	A1	control	0.161562
	-58	17.4319	9.47067			Retrieval day 3	shocked	0.14231	0.182541			0.063632	170		0.047686	40	0.047686	33		pre-shocks	A2	control	0.069461
	-57	17.0189	9.40228									0.079578	75		0.063632	27	0.063632	23		pre-shocks	A4	shocked	-0.078169
	-56	16.6828	9.19688			Retrieval day 1	control	0.100739	0.135134			0.111471	77		0.079578	30	0.079578	25		pre-shocks	A4	control	0.219924
	-55	16.5588	8.8926			Retrieval day 2	control	0.15284	0.195606			0.127417	89		0.095525	20	0.095525	26		pre-shocks	B8	shocked	0.109434
	-54	16.6612	8.81394			Retrieval day 3	control	0.06248	0.154495			0.143363	49		0.111471	23	0.111471	22		pre-shocks	B8	control	0.257407
	-53	16.7921	8.88192									0.159309	12		0.127417	28	0.127417	25		pre-shocks	C10	shocked	0.35336
	-52	16.7775	8.89695			Figure 1f						0.175256	137		0.143363	29	0.143363	24		pre-shocks	C10	control	0.158709
	-51	16.6015	8.96676				context	Mean freezing	Standard deviation			0.207148	60		0.159309	19	0.159309	23		pre-shocks	C4	shocked	0.167852
	-50	16.6267	9.05201			Retrieval day 1	shocked	-0.026693	0.099201			0.223094	48		0.175256	24	0.175256	35		pre-shocks	C4	control	0.141804
	-49	16.6626	8.97474			Retrieval day 2	shocked	-0.031244	0.075529			0.23904	85		0.191202	25	0.191202	55		pre-shocks	C7	shocked	0.134769
	-48	16.5705	8.94719			Retrieval day 3	shocked	-0.011704	0.073063			0.302825	108		0.207148	21	0.207148	54		pre-shocks	C7	control	0.062116
	-47	16.3169	9.09115									0.350664	146		0.223094	23	0.223094	27		pre-shocks	E5	shocked	0.063691
	-46	16.4076	9.05362			Retrieval day 1	control	-0.013899	0.223165			0.36661	18		0.23904	14	0.23904	20		pre-shocks	E5	control	0.504579
	-45	16.5449	9.12116			Retrieval day 2	control	-0.077592	0.203953			0.398503	190		0.254987	23	0.254987	20		pre-shocks	MR3a	shocked	0.14195
	-44	17.1233	9.14058			Retrieval day 3	control	-0.0828	0.212699			0.430395	293		0.270933	15	0.270933	19		pre-shocks	MR3a	control	0.155541
	-43	17.4878	9.09208									0.446341	39		0.286879	27	0.286879	16		pre-shocks	MR3e	shocked	0.249032
	-42	17.5032	9.05041			Figure 1g						0.462287	171		0.302825	14	0.302825	13		pre-shocks	MR3e	control	0.303166
	-41	17.2454	8.93767				context	Mean freeze length	Standard deviation			0.49418	145		0.318772	17	0.318772	33		pre-shocks	MR4d	shocked	0.192244
	-40	16.8742	8.85369				shocked	19.6183	15.3443			0.510126	181		0.334718	23	0.334718	24		pre-shocks	MR4d	control	0.399888
	-39	16.8648	8.86555				control	12.1886	8.71448						0.350664	28	0.350664	30		pre-shocks	MR5b	shocked	0.094638
	-38	16.8236	8.88538												0.36661	21	0.36661	22		pre-shocks	MR5b	control	0.064965
	-37	16.8756	8.92268												0.382556	21	0.382556	23		pre-shocks	MR6a	shocked	0.693768
	-36	17.0873	8.95506												0.398503	26	0.398503	32		pre-shocks	MR6a	control	0.333164
	-35	17.3979	9.05054												0.414449	25	0.414449	30		pre-shocks	MR6b	shocked	0.194386
	-34	17.2965	9.00083												0.430395	30	0.430395	32		pre-shocks	MR6b	control	0.309333
	-33	17.1449	8.9288												0.446341	16	0.446341	37		pre-shocks	MR6e	shocked	0.061359
	-32	17.0061	8.75958												0.462287	21	0.462287	30		pre-shocks	MR6e	control	0.222185
	-31	16.8413	8.71068												0.478234	17	0.478234	22		pre-shocks	MR7c	control	0.118748
	-30	16.984	8.69503												0.49418	26	0.49418	38		pre-shocks	MR7e	shocked	0.20555
	-29	17.1204	8.67076												0.510126	27	0.510126	14		pre-shocks	MR7e	control	0.192197
	-28	16.9579	8.61614												0.526072	32	0.526072	16		pre-shocks	MR8a	shocked	0.309664
	-27	16.2401	8.30709												0.542018	28	0.542018	22		pre-shocks	MR8a	control	0.118485
	-26	15.4247	8.11847												0.557965	27	0.557965	19		pre-shocks	MR8c	shocked	0.044814
	-25	14.9417	8.08367												0.573911	42	0.573911	40		pre-shocks	MR8c	control	0.075089
	-24	15.1406	8.05499												0.589857	21	0.589857	18		pre-shocks	RE6e	shocked	0.143819
	-23	15.4147	8.13758												0.605803	29	0.605803	25		pre-shocks	RE6e	control	0.114124
	-22	15.3729	8.1843																	retrieval day 1	A1	shocked	0.062269
	-21	15.2139	8.20254																	retrieval day 2	A1	control	0.096112
	-20	15.3022	8.22628																	retrieval day 3	A2	shocked	0.081188
	-19	15.4682	8.34078																	retrieval day 4	A2	control	0.178046
	-18	15.492	8.34545																	retrieval day 5	A4	shocked	0.118139
	-17	15.2678	8.27921																	retrieval day 6	A4	control	0.001068
	-16	14.8354	8.12705																	retrieval day 7	B8	shocked	0.104008
	-15	14.5135	7.95929																	retrieval day 8	B8	control	0.16779
	-14	14.367	7.82185																	retrieval day 9	C10	shocked	0.134947
	-13	14.4083	7.6979																	retrieval day 10	C10	control	0.079403
	-12	14.4064	7.67825																	retrieval day 11	C4	shocked	0.096125
	-11	14.3514	7.76121																	retrieval day 12	C4	control	0.013068
	-10	14.354	7.85945																	retrieval day 13	C7	shocked	0.042081
	-9	14.4923	7.89254																	retrieval day 14	C7	control	0.039671
	-8	14.6735	8.05151																	retrieval day 15	E5	shocked	0.019412
	-7	15.1694	8.1403																	retrieval day 16	E5	control	0.046361
	-6	15.5238	8.2181																	retrieval day 17	MR3a	shocked	0.090662
	-5	15.5756	8.36394																	retrieval day 18	MR3a	control	0.180189
	-4	15.7941	8.40354																	retrieval day 19	MR3e	shocked	0.228718
	-3	16.3408	8.56566																	retrieval day 20	MR3e	control	0.132715
	-2	16.8766	8.75468																	retrieval day 21	MR4d	shocked	0.082021
	-1	17.2383	8.79895																	retrieval day 22	MR4d	control	0.137645
	0	17.6894	8.76934																	retrieval day 23	MR5b	shocked	0.156095
	1	17.9354	8.80688																	retrieval day 24	MR5b	control	0.135519
	2	18.1912	9.12629																	retrieval day 25	MR6a	shocked	0.06112
	3	18.2946	9.74966																	retrieval day 26	MR6a	control	0.206037
	4	18.8801	10.4543																	retrieval day 27	MR6b	shocked	0.030079
	5	19.9557	11.05																	retrieval day 28	MR6b	control	0.063411
	6	20.8919	11.5547																	retrieval day 29	MR6e	shocked	0.071577
	7	21.2648	11.8911																	retrieval day 30	MR6e	control	0.110453
	8	21.4247	12.448																	retrieval day 31	MR7c	shocked	0.195237
	9	21.6644	13.2334																	retrieval day 32	MR7c	control	0.501952
	10	22.1681	14.1581																	retrieval day 33	MR7e	shocked	0.157052
	11	22.7958	15.1326																	retrieval day 34	MR7e	control	0.131294
	12	23.3374	16.2308																	retrieval day 35	MR8a	shocked	0.121081
	13	23.7444	17.2862																	retrieval day 36	MR8a	control	0.225722
	14	24.1701	18.3318																	retrieval day 37	MR8c	shocked	0.076518
	15	24.9041	19.3664																	retrieval day 38	MR8c	control	0.177097
	16	25.8712	20.2999																	retrieval day 39	RE6e	shocked	0.090543
	17	26.815	21.3534																	retrieval day 40	RE6e	control	0.193526
	18	27.519	22.3045																	retrieval day 2	A1	shocked	0.134869
	19	28.1395	23.322																	retrieval day 3	A1	control	0.037229
	20	29.8138	24.5989																	retrieval day 4	A2	shocked	0.067694
	21	32.1832	26.2847																	retrieval day 5	A2	control	0.03228
	22	34.3779	28.1043																	retrieval day 6	A4	shocked	0.065997
	23	36.1106	29.7852																	retrieval day 7	A4	control	0.030426
	24	37.5399	31.0297																	retrieval day 8	B8	shocked	0.131757
	25	38.7469	31.6735																	retrieval day 9	B8	control	0.145651
	26	40.1656	32.4792																	retrieval day 10	C10	shocked	0.137678
	27	41.6265	33.4769																	retrieval day 11	C10	control	0.188352
	28	43.0664	34.4384																	retrieval day 12	C4	shocked	0.053321
	29	43.7881	35.0477																	retrieval day 13	C4	control	0.176912
	30	44.8203	35.33																	retrieval day 14	C7	shocked	0.237178
	31	45.4171	35.4633																	retrieval day 15	C7	control	0.140298
	32	45.778	35.6317																	retrieval day 16	E5	shocked	0.03892
	33	46.2321	35.5695																	retrieval day 17	E5	control	0.115032
	34	47.0244	35.4242																	retrieval day 18	MR3a	shocked	0.133285
	35	47.6963	35.1167																	retrieval day 19	MR3a	control	0.081933
	36	48.3135	34.6952																	retrieval day 20	MR3e	shocked	-0.005431
	37	47.9831	34.0188																	retrieval day 21	MR3e	control	0.301516
	38	46.982	32.9775																	retrieval day 22	MR4d	shocked	0.097857
	39	45.8073	32.2876																	retrieval day 23	MR4d	control	0.053159
	40	45.1431	32.0913																	retrieval day 24	MR5b	shocked	0.111757
	41	44.6746	31.9907																	retrieval day 25	MR5b	control	0.131234
	42	44.0996	32.0183																	retrieval day 26	MR6a	shocked	0.273032
	43	43.3244	31.8245																	retrieval day 27	MR6a	control	0.297069
	44	43.0962	31.8544																	retrieval day 28	MR6b	shocked	0.101927
	45	42.5971	31.5234																	retrieval day 29	MR6b	control	0.114251
	46	41.7494	31.1595																	retrieval day 30	MR6e	shocked	0.093583
	47	41.2378	30.7862																	retrieval day 31	MR6e	control	0.073366
	48	41.0043	30.807																	retrieval day 32	MR7c	shocked	0.193128
	49	41.0631	30.9368																	retrieval day 33	MR7c	control	0.092735
	50	41.1061	31.1722																	retrieval day 34	MR7e	shocked	0.114631
	51	40.7304	31.4569																	retrieval day 35	MR7e	control	0.23304
	52	39.4813	31.1961																	retrieval day 36	MR8a	shocked	0.074828
	53	38.3845	30.4803																	retrieval day 37	MR8c	shocked	0.113635
	54	37.0827	29.7861																	retrieval day 38	MR8c	control	0.168994
	55	34.6281	28.9951																	retrieval day 39	RE6e	shocked	0.078781
	56	33.3922	28.7639																	retrieval day 40	RE6e	control	0.165303
	57	32.9349	29.1676																	retrieval day 3	A1	shocked	0.053579
	58	32.416	29.2382																	retrieval day 4	A1	control	0.191566
	59	31.0793	29.0749																	retrieval day 5	A2	shocked	0.098363
	60	29.8676	28.4321																	retrieval day 6	A2	control	0.110201
	61	29.0025	27.5856																	retrieval day 7	A4	shocked	0.093935
	62	28.9261	26.895																	retrieval day 8	A4	control	0.102969
	63	29.0455	26.6356																	retrieval day 9	B8	shocked	0.169158
	64	28.5198	26.0215																	retrieval day 10	B8	control	0.290741
	65	27.894	25.4879																	retrieval day 11	C10	shocked	0.158943
	66	27.6047	24.8292																	retrieval day 12	C10	control	0.078506
	67	27.3679	24.1666																	retrieval day 13	C4	shocked	0.106981
	68	27.0314	23.8361																	retrieval day 14	C4	control	0.140363
	69	26.9651	23.6256																	retrieval day 15	C7	shocked	0.111003
	70	27.0336	23.7228																	retrieval day 16	C7	control	0.146327
	71	27.0934	23.5576																	retrieval day 17	E5	shocked	0.294733
	72	26.7163	22.997																	retrieval day 18	E5	control	0.115569
	73	26.397	22.5102																	retrieval day 19	MR3a	shocked	0.01861
	74	26.1127	22.0487																	retrieval day 20	MR3a	control	0.287663
	75	25.5257	21.4318																	retrieval day 21	MR3e	shocked	0.073879
	76	25.0726	20.867																	retrieval day 22	MR3e	control	0.279412
	77	24.5528	20.4945																	retrieval day 23	MR4d	shocked	0.158145
	78	24.1304	20.0207																	retrieval day 24	MR4d	control	0.132637
	79	23.7846	19.7702																	retrieval day 25	MR5b	shocked	0.127057
	80	23.5864	19.4127																	retrieval day 26	MR5b	control	0.289136
	81	23.5275	18.8305																	retrieval day 27	MR6a	shocked	0.159702
	82	23.5171	18.4391																	retrieval day 28	MR6a	control	0.08004
	83	23.0737	18.0641																	retrieval day 29	MR6b	shocked	0.162509
	84	22.3711	17.703																	retrieval day 30	MR6b	control	0.165608
	85	21.6058	17.3888																	retrieval day 31	MR6e	shocked	0.055505
	86	21.0197	17.0056																	retrieval day 32	MR6e	control	0.060253
	87	20.6404	16.5927																	retrieval day 33	MR7c	shocked	0.318309
	88	20.0697	15.9441																	retrieval day 34	MR7c	control	0.307745
	89	19.4342	15.37																	retrieval day 35	MR7e	shocked	0.247974
	90	18.9356	14.5892																	retrieval day 36	MR7e	control	0.170034
	91	18.2846	13.7534																	retrieval day 37	MR8a	shocked	0.211876
	92	17.6602	13.1186																	retrieval day 38	MR8a	control	0.269408
	93	17.1272	12.6284																	retrieval day 39	MR8c	shocked	0.054756
																				retrieval day 40	MR8c	control	0.131745
																				retrieval day 41	RE6e	shocked	0.11098
																				retrieval day 42	RE6e	control	0.104878

## Sheet: Figure 2
Figure 2
	Figure 2d&e	context	mouse name	day	value
		shocked	M3	pre-shocks	0
		shocked	M3	retrieval day 1	0.427034
		shocked	M3	retrieval day 2	0.619082
		shocked	M3	retrieval day 3	0.365395
		shocked	M4	pre-shocks	0
		shocked	M4	retrieval day 1	0.883496
		shocked	M4	retrieval day 2	0.544687
		shocked	M4	retrieval day 3	0.093114
		shocked	M5	pre-shocks	0
		shocked	M5	retrieval day 1	0.735435
		shocked	M5	retrieval day 2	0.362617
		shocked	M5	retrieval day 3	0.458996
		shocked	R3	pre-shocks	0
		shocked	R3	retrieval day 1	0.832407
		shocked	R3	retrieval day 2	0.713054
		shocked	R3	retrieval day 3	0.2283
		shocked	R4	pre-shocks	0
		shocked	R4	retrieval day 1	0.500026
		shocked	R4	retrieval day 2	0.558906
		shocked	R4	retrieval day 3	0.031696
		shocked	X2	pre-shocks	0
		shocked	X2	retrieval day 1	0.451744
		shocked	X2	retrieval day 2	0.303289
		shocked	X2	retrieval day 3	0.107643
		shocked	X7	pre-shocks	0
		shocked	X7	retrieval day 1	0.538982
		shocked	X7	retrieval day 2	0.526154
		shocked	X7	retrieval day 3	0.228111
		shocked	Z1	pre-shocks	0
		shocked	Z1	retrieval day 1	0.448417
		shocked	Z1	retrieval day 2	0.3078
		shocked	Z1	retrieval day 3	0.232597
		shocked	Z4	pre-shocks	0
		shocked	Z4	retrieval day 1	0.545622
		shocked	Z4	retrieval day 2	0.391661
		shocked	Z4	retrieval day 3	0.224487
		safe	M3	pre-shocks	0
		safe	M3	retrieval day 1	0.482869
		safe	M3	retrieval day 2	0.170711
		safe	M3	retrieval day 3	0.064751
		safe	M4	pre-shocks	0
		safe	M4	retrieval day 1	0.842849
		safe	M4	retrieval day 2	-0.055701
		safe	M4	retrieval day 3	0.024168
		safe	M5	pre-shocks	0
		safe	M5	retrieval day 1	0.278958
		safe	M5	retrieval day 2	0.543346
		safe	M5	retrieval day 3	0.173959
		safe	R3	pre-shocks	0
		safe	R3	retrieval day 1	0.32325
		safe	R3	retrieval day 2	0.213934
		safe	R3	retrieval day 3	0.021167
		safe	R4	pre-shocks	0
		safe	R4	retrieval day 1	0.172652
		safe	R4	retrieval day 2	0.02336
		safe	R4	retrieval day 3	-0.013642
		safe	X2	pre-shocks	0
		safe	X2	retrieval day 1	0.351503
		safe	X2	retrieval day 2	0.293059
		safe	X2	retrieval day 3	0.308295
		safe	X7	pre-shocks	0
		safe	X7	retrieval day 1	0.189843
		safe	X7	retrieval day 2	0.19812
		safe	X7	retrieval day 3	0.275288
		safe	Z1	pre-shocks	0
		safe	Z1	retrieval day 1	0.171036
		safe	Z1	retrieval day 2	-0.019387
		safe	Z1	retrieval day 3	-0.058088
		safe	Z4	pre-shocks	0
		safe	Z4	retrieval day 1	-0.024248
		safe	Z4	retrieval day 2	0.029505
		safe	Z4	retrieval day 3	-0.066358

## Sheet: Figure 3
Figure 3
	Figure 3a							Figure 3c						Figure 3f
	condition	day	context	mean	standard deviation			condition	context	Mean freeze length	Standard deviation			condition	day	context	mean	standard deviation
	NR inhibited	pre-shocks	shocked	0	0			NR intact	shocked	19.6183	15.3443			NR inhibited	pre-shocks	dark	0	0
	NR inhibited	retrieval day 1	shocked	0.595907	0.174687			NR inhibited	shocked	35.0941	10.698			NR inhibited	retrieval day 1	dark	0.013899	0.099201
	NR inhibited	retrieval day 2	shocked	0.480806	0.145196									NR inhibited	retrieval day 2	dark	-0.007592	0.075529
	NR inhibited	retrieval day 3	shocked	0.218926	0.133578			Figure 3d						NR inhibited	retrieval day 3	dark	0.048867	0.073063
	NR intact	pre-shocks	shocked	0	0			condition	context	Mean freeze length	Standard deviation			NR intact	pre-shocks	dark	0	0
	NR intact	retrieval day 1	shocked	0.344649	0.150434			NR intact	control	12.1886	8.71448			NR intact	retrieval day 1	dark	-0.025094	0.013953
	NR intact	retrieval day 2	shocked	0.296188	0.1514			NR inhibited	control	21.6173	12.9371			NR intact	retrieval day 2	dark	-0.007103	0.012699
	NR intact	retrieval day 3	shocked	0.14231	0.182541									NR intact	retrieval day 3	dark	-0.042112	0.023165
	Figure 3b							Figure 3e
	condition	day	context	mean	standard deviation
	NR inhibited	pre-shocks	control	0	0			day	condition	bdi
	NR inhibited	retrieval day 1	control	0.309857	0.245206			pre-shocks	NR inhibited	0.103642	0.414766
	NR inhibited	retrieval day 2	control	0.155216	0.188194			pre-shocks	NR intact	0.046415	0.517392
	NR inhibited	retrieval day 3	control	0.08106	0.139258			retrieval day 1	NR inhibited	-0.155937	0.132224
	NR intact	pre-shocks	control	0	0			retrieval day 1	NR intact	-0.33195	0.261222
	NR intact	retrieval day 1	control	0.100739	0.135134			retrieval day 2	NR inhibited	-0.287053	0.366561
	NR intact	retrieval day 2	control	0.15284	0.195606			retrieval day 2	NR intact	-0.22618	0.269874
	NR intact	retrieval day 3	control	0.06248	0.154495			retrieval day 3	NR inhibited	-0.1439	0.299257
								retrieval day 3	NR intact	-0.085514	0.346427

## Sheet: Figure 4
Figure 4
	Fig 4c							Fig 4e
	context	day	behavioral status	mean	standard deviation
	shocked	pre-shocks	running	0.241859	0.214458			bins	da label	mean normalized delta f/f	standard deviation
	shocked	pre-shocks	freezing	0.308333	0.205485			0-20%	post-shocks	0.170985	0.128575
	shocked	retrieval day 1	running	0.249439	0.240033			0-20%	pre-shocks	0.19006	0.104115
	shocked	retrieval day 1	freezing	0.324762	0.232499			20-40%	post-shocks	0.26577	0.12836
	shocked	retrieval day 2	running	0.236602	0.221198			20-40%	pre-shocks	0.184828	0.091844
	shocked	retrieval day 2	freezing	0.348615	0.2483			40-60%	post-shocks	0.276496	0.137367
	shocked	retrieval day 3	running	0.238105	0.248973			40-60%	pre-shocks	0.197951	0.098093
	shocked	retrieval day 3	freezing	0.376978	0.238992			60-80%	post-shocks	0.271469	0.147088
	control	pre-shocks	running	0.266148	0.226982			60-80%	pre-shocks	0.180455	0.094918
	control	pre-shocks	freezing	0.287176	0.218487			80-100%	post-shocks	0.245776	0.135838
	control	retrieval day 1	running	0.188037	0.199703			80-100%	pre-shocks	0.172354	0.087022
	control	retrieval day 1	freezing	0.32823	0.227762
	control	retrieval day 2	running	0.203325	0.183864
	control	retrieval day 2	freezing	0.317695	0.22872
	control	retrieval day 3	running	0.196432	0.194343
	control	retrieval day 3	freezing	0.411209	0.24968
	Fig 4d
	shocked mean (left)	shocked standard deviation (left)	control mean (left)	control standard deviation (left)	shocked mean (right)	shocked standard deviation (right)	control mean (right)	control standard deviation (right)
	0.098098	0.166547	0.149641	0.213083	0.085376	0.152057	0.130438	0.204373
	0.085422	0.158063	0.155261	0.213705	0.08837	0.161401	0.135462	0.207979
	0.089316	0.148572	0.156671	0.215931	0.090174	0.147512	0.137064	0.205471
	0.094325	0.154496	0.157425	0.21341	0.09313	0.153362	0.137931	0.207156
	0.094356	0.150954	0.158755	0.212211	0.09692	0.155367	0.139337	0.207284
	0.086988	0.147764	0.16064	0.213055	0.099926	0.16013	0.142844	0.207515
	0.084113	0.154499	0.161234	0.216447	0.09842	0.160445	0.14494	0.204935
	0.08528	0.145319	0.161655	0.218422	0.100069	0.156944	0.147094	0.206489
	0.088629	0.143285	0.160574	0.216837	0.101657	0.157391	0.148118	0.206717
	0.086142	0.149465	0.15916	0.216802	0.102205	0.166882	0.148065	0.207721
	0.082193	0.14155	0.158472	0.214806	0.100482	0.168196	0.148225	0.208102
	0.076748	0.147404	0.158015	0.215007	0.095151	0.16075	0.147541	0.21052
	0.069393	0.156086	0.158416	0.21379	0.085889	0.149949	0.144583	0.211287
	0.065588	0.152686	0.159953	0.213075	0.078594	0.165155	0.141217	0.211954
	0.065435	0.151014	0.161297	0.215719	0.072993	0.154444	0.138662	0.213293
	0.067262	0.149887	0.161403	0.21461	0.068583	0.149259	0.138249	0.212946
	0.072839	0.149487	0.161002	0.21463	0.065807	0.163216	0.13815	0.212063
	0.078437	0.147928	0.16155	0.216169	0.064779	0.157927	0.138787	0.20995
	0.079056	0.155876	0.162808	0.210444	0.059633	0.161875	0.138822	0.211484
	0.07727	0.144857	0.164718	0.213617	0.054633	0.150259	0.13907	0.208379
	0.076592	0.134422	0.165652	0.216611	0.052859	0.146922	0.140082	0.207023
	0.074562	0.122958	0.165937	0.219088	0.055323	0.150905	0.141439	0.207817
	0.073516	0.127393	0.165067	0.217454	0.060844	0.15886	0.143334	0.210777
	0.075985	0.131905	0.163061	0.214042	0.066511	0.169083	0.145903	0.215024
	0.079177	0.120187	0.160615	0.215197	0.068548	0.160883	0.148986	0.214855
	0.07915	0.12137	0.157847	0.217038	0.067636	0.163432	0.14998	0.211112
	0.077941	0.119256	0.155776	0.213734	0.068252	0.164629	0.149109	0.209918
	0.073644	0.11952	0.154686	0.211749	0.070574	0.163798	0.147738	0.211609
	0.068693	0.110616	0.153237	0.207858	0.071362	0.164951	0.146876	0.211664
	0.065575	0.11709	0.150888	0.206118	0.069602	0.162158	0.147579	0.21386
	0.061988	0.115525	0.149091	0.201505	0.069112	0.163941	0.148945	0.215299
	0.058217	0.116493	0.148741	0.197594	0.067737	0.147184	0.149436	0.216405
	0.055267	0.119857	0.147508	0.196064	0.066601	0.153512	0.148219	0.219154
	0.056968	0.112825	0.145572	0.194438	0.06395	0.159006	0.145974	0.215669
	0.060005	0.119136	0.144403	0.193011	0.061676	0.153187	0.143437	0.210118
	0.064868	0.116438	0.143785	0.194391	0.060369	0.146631	0.140658	0.208324
	0.068491	0.12574	0.144108	0.194403	0.062924	0.149394	0.138901	0.204984
	0.07136	0.140356	0.142931	0.198384	0.06825	0.162684	0.136413	0.203569
	0.073702	0.147035	0.139739	0.198361	0.07399	0.161856	0.132889	0.19526
	0.075594	0.151564	0.13491	0.201147	0.080741	0.163808	0.127642	0.195315
	0.076982	0.149648	0.130486	0.197522	0.089711	0.169608	0.121046	0.191349
	0.079065	0.165005	0.125856	0.197312	0.0951	0.175449	0.11325	0.189941
	0.082935	0.169016	0.119298	0.193799	0.096743	0.173677	0.104299	0.184715
	0.087504	0.161081	0.113104	0.18626	0.09829	0.171778	0.095168	0.178247
	0.089606	0.159503	0.10715	0.184409	0.105593	0.170179	0.08625	0.174881
	0.087835	0.154253	0.100473	0.179743	0.114907	0.176293	0.078121	0.169415
	0.08084	0.13241	0.092371	0.173069	0.12492	0.181227	0.0698	0.164508
	0.074268	0.138191	0.082886	0.165892	0.129464	0.188468	0.061173	0.162963
	0.069591	0.135933	0.073464	0.161736	0.126927	0.181693	0.052519	0.161042
	0.070725	0.131144	0.065226	0.161318	0.121786	0.180937	0.043552	0.15813
	0.072494	0.129488	0.059056	0.156629	0.118403	0.176333	0.035697	0.153593
	0.07344	0.13414	0.052723	0.152903	0.116547	0.182615	0.029544	0.1488
	0.072369	0.132326	0.045887	0.152372	0.116137	0.187506	0.024099	0.146097
	0.068833	0.134162	0.039859	0.151834	0.119894	0.195983	0.01932	0.145319
	0.069947	0.143747	0.033491	0.147992	0.118305	0.198261	0.015433	0.148865
	0.07228	0.154257	0.02845	0.14852	0.115973	0.193164	0.010815	0.148806
	0.075977	0.164205	0.023929	0.148124	0.114273	0.190112	0.005846	0.151249
	0.078707	0.171818	0.020993	0.151195	0.114693	0.184752	0.001403	0.154216
	0.08137	0.173753	0.017894	0.1546	0.116741	0.188839	-0.002312	0.153008
	0.086046	0.182192	0.015383	0.155799	0.119412	0.186856	-0.004895	0.152441
	0.087561	0.17413	0.012464	0.167345	0.120197	0.179428	-0.005905	0.152664
	0.091661	0.166223	0.008733	0.167195	0.116254	0.177268	-0.00746	0.150493
	0.094833	0.163174	0.005503	0.179412	0.116084	0.181491	-0.010368	0.150468
	0.097214	0.158503	0.003843	0.179422	0.116505	0.178954	-0.012696	0.156258
	0.099448	0.155861	0.003513	0.183157	0.117272	0.180734	-0.01455	0.158887
	0.096942	0.152564	0.002312	0.185837	0.122024	0.187456	-0.015702	0.158784
	0.094251	0.141248	0.000161	0.191288	0.125348	0.185041	-0.016709	0.163142
	0.092966	0.145848	-0.00363	0.194459	0.126265	0.199048	-0.018139	0.161415
	0.096332	0.133045	-0.007847	0.195716	0.123143	0.200802	-0.019635	0.1671
	0.097644	0.133994	-0.009773	0.19604	0.121715	0.197526	-0.021173	0.170876
	0.095463	0.123218	-0.01106	0.196565	0.119934	0.18842	-0.023095	0.173167
	0.09256	0.122824	-0.012314	0.199617	0.121059	0.197303	-0.026523	0.175348
	0.085881	0.134384	-0.012737	0.202348	0.128238	0.20322	-0.030355	0.173163
	0.081417	0.133053	-0.013536	0.201086	0.133479	0.187146	-0.033638	0.169486
	0.080376	0.143061	-0.015203	0.204729	0.137005	0.188226	-0.035847	0.170657
	0.082051	0.135321	-0.016492	0.207493	0.140156	0.205529	-0.037168	0.171533
	0.088417	0.12915	-0.016427	0.20867	0.141974	0.199185	-0.039109	0.168573
	0.09288	0.130549	-0.016858	0.215195	0.140218	0.197971	-0.040473	0.169659
	0.090856	0.138561	-0.015478	0.217738	0.136683	0.191243	-0.042257	0.1703
	0.082014	0.134163	-0.015613	0.216898	0.135485	0.171964	-0.044024	0.170205
	0.074169	0.13427	-0.017956	0.215017	0.135292	0.170027	-0.046219	0.169592
	0.072481	0.125367	-0.020237	0.215802	0.139529	0.17469	-0.048614	0.168382
	0.075903	0.127818	-0.021495	0.214176	0.145065	0.174804	-0.049504	0.166917
	0.081498	0.120238	-0.022302	0.214062	0.146845	0.174762	-0.048105	0.170848
	0.084834	0.129239	-0.022759	0.214036	0.145641	0.188963	-0.045758	0.171749
	0.085247	0.124101	-0.02293	0.215361	0.144673	0.18297	-0.044697	0.17122
	0.085299	0.11786	-0.023691	0.21187	0.14379	0.17884	-0.043336	0.171442
	0.085513	0.113151	-0.025098	0.208384	0.145013	0.177504	-0.043339	0.171796
	0.086194	0.10977	-0.026413	0.204958	0.146111	0.178504	-0.044298	0.173012
	0.085084	0.11124	-0.0255	0.203346	0.139658	0.183786	-0.044508	0.169356

## Sheet: Figure 5
Figure 5
	Figure 5b
	Left: shocked context mean	Left: shocked context standard deviation	Left: control context mean	Left: control context standard deviation	Middle left: shocked context mean	Middle left: shocked context standard deviation	Middle left: control context mean	Middle left: control context standard deviation	Middle right: shocked context mean	Middle right: shocked context standard deviation	Middle right: control context mean	Middle right: control context standard deviation	Right: shocked context mean	Right: shocked context standard deviation	Right: control context mean	Right: control context standard deviation					Figure 5c							Figure 5d
	0.125148	0.150959	0.140277	0.16463	0.169551	0.187247	0.120877	0.184836	0.129569	0.12167	0.137589	0.126449	0.130418	0.109457	0.160992	0.164409					context	day	behavioral status	mean	standard deviation				pre-shocks mean	pre-shocks standard deviation	post-shocks mean	post-shocks standard deviation
	0.110921	0.147357	0.157403	0.178182	0.181276	0.181057	0.123288	0.199959	0.14023	0.117525	0.14225	0.137019	0.138375	0.116338	0.162324	0.16285					shocked	pre-shocks	running	0.20102	0.076692			0-20%	0.190127	0.175103	0.265398	0.214663
	0.118509	0.141409	0.160985	0.145555	0.186075	0.190561	0.131566	0.196381	0.136203	0.130276	0.141351	0.135269	0.138349	0.113124	0.161767	0.137213					shocked	pre-shocks	freezing	0.200187	0.075532			20-40%	0.17513	0.158248	0.268593	0.217704
	0.12551	0.144411	0.163957	0.155284	0.187914	0.177595	0.137949	0.202586	0.132657	0.12961	0.141149	0.136601	0.135444	0.105526	0.165341	0.132894					shocked	retrieval day 1	running	0.133144	0.085025			40-60%	0.182742	0.175305	0.273437	0.203147
	0.124039	0.136662	0.169714	0.158243	0.189555	0.170677	0.140705	0.20274	0.134272	0.128981	0.144297	0.137215	0.132977	0.096719	0.172704	0.138015					shocked	retrieval day 1	freezing	0.278232	0.153072			60-80%	0.176964	0.174303	0.26912	0.221393
	0.112083	0.138992	0.176095	0.161805	0.194631	0.185832	0.143961	0.187553	0.14023	0.128055	0.155601	0.150203	0.133619	0.100639	0.180891	0.138154					shocked	retrieval day 2	running	0.230905	0.090041			80-100%	0.169418	0.156294	0.247421	0.24142
	0.10764	0.153244	0.176223	0.151183	0.200891	0.196652	0.145065	0.175962	0.139756	0.130354	0.161269	0.153779	0.136665	0.105311	0.182421	0.132274					shocked	retrieval day 2	freezing	0.246466	0.102824
	0.109542	0.143866	0.179864	0.138817	0.204234	0.202645	0.148142	0.181488	0.138063	0.127428	0.163767	0.133312	0.141761	0.109585	0.183118	0.120973					shocked	retrieval day 3	running	0.043576	0.093347
	0.116308	0.140337	0.184408	0.146076	0.204207	0.206048	0.148278	0.189743	0.134151	0.126987	0.164507	0.132233	0.1449	0.111817	0.187469	0.125189					shocked	retrieval day 3	freezing	0.069397	0.089007
	0.114807	0.142499	0.189235	0.162585	0.202433	0.202821	0.143616	0.188096	0.132939	0.146783	0.166632	0.131642	0.145476	0.123475	0.192328	0.132781					control	pre-shocks	running	0.205231	0.097172
	0.111193	0.138234	0.188985	0.169574	0.198344	0.205742	0.140082	0.190666	0.130969	0.142149	0.170423	0.128508	0.145869	0.121747	0.193224	0.135235					control	pre-shocks	freezing	0.204238	0.098769
	0.103108	0.144811	0.181439	0.157091	0.193729	0.196211	0.135681	0.201213	0.128092	0.138921	0.177176	0.132853	0.149815	0.127209	0.192916	0.130604					control	retrieval day 1	running	0.087428	0.086081
	0.091258	0.153661	0.166711	0.137905	0.194016	0.195105	0.127868	0.1933	0.1286	0.122676	0.179776	0.141924	0.157203	0.138714	0.188364	0.137078					control	retrieval day 1	freezing	0.261812	0.127409
	0.084494	0.148645	0.154846	0.173178	0.19502	0.187449	0.11912	0.19686	0.129854	0.118952	0.175376	0.144434	0.168277	0.146625	0.183014	0.123307					control	retrieval day 2	running	0.176592	0.032772
	0.084633	0.140775	0.143892	0.15923	0.196593	0.200394	0.112673	0.195674	0.129787	0.121824	0.170115	0.155007	0.180113	0.147757	0.176689	0.129961					control	retrieval day 2	freezing	0.205816	0.03452
	0.08801	0.147859	0.136752	0.153569	0.198738	0.198527	0.109854	0.195109	0.126292	0.131669	0.169587	0.14574	0.187249	0.139772	0.173457	0.126392					control	retrieval day 3	running	0.016746	0.047459
	0.095889	0.146133	0.131908	0.181075	0.194094	0.185725	0.107846	0.201883	0.123999	0.129612	0.17258	0.121068	0.189049	0.141739	0.170966	0.115669					control	retrieval day 3	freezing	0.112539	0.005417
	0.104871	0.141761	0.128851	0.173266	0.189641	0.185694	0.107336	0.201437	0.124036	0.11883	0.1797	0.105336	0.189452	0.142537	0.172331	0.128823
	0.107504	0.157012	0.120081	0.17996	0.190076	0.170437	0.106167	0.205164	0.124257	0.115354	0.184051	0.109528	0.189011	0.143543	0.174684	0.136048
	0.106687	0.144015	0.111128	0.155705	0.194808	0.173892	0.107774	0.19632	0.127642	0.123092	0.181753	0.118929	0.189092	0.146638	0.170601	0.121688
	0.106535	0.133967	0.108202	0.145091	0.198919	0.187483	0.110249	0.193114	0.126695	0.126455	0.176291	0.093237	0.189876	0.139896	0.166529	0.125505
	0.104693	0.114224	0.114195	0.156619	0.205122	0.198073	0.115815	0.196237	0.124135	0.131177	0.174176	0.090624	0.191131	0.145065	0.16285	0.12199
	0.105424	0.12291	0.125985	0.156258	0.207915	0.210204	0.123159	0.193907	0.12201	0.126948	0.170601	0.111981	0.186287	0.144979	0.160788	0.127287
	0.111222	0.133311	0.135198	0.173363	0.202957	0.203292	0.131323	0.198156	0.117039	0.115329	0.166972	0.133399	0.180214	0.127043	0.160172	0.130148
	0.118606	0.117991	0.137633	0.146872	0.198819	0.207588	0.138586	0.192117	0.111084	0.112274	0.162468	0.131497	0.174526	0.122915	0.161457	0.125681
	0.121283	0.116072	0.138322	0.155574	0.192302	0.20059	0.140345	0.180344	0.106715	0.110022	0.15757	0.124617	0.16916	0.120179	0.160883	0.121425
	0.122219	0.110013	0.141686	0.151411	0.186306	0.180902	0.138179	0.180286	0.10629	0.117037	0.154062	0.135896	0.165596	0.121735	0.158246	0.119445
	0.119264	0.109695	0.148205	0.159158	0.185871	0.176196	0.133727	0.171457	0.105364	0.127086	0.152844	0.143878	0.163527	0.136658	0.156657	0.127584
	0.114693	0.099549	0.151259	0.154215	0.184017	0.180474	0.130183	0.171719	0.10535	0.133835	0.151637	0.16665	0.161497	0.134504	0.156243	0.120639
	0.110441	0.105861	0.146585	0.153294	0.179093	0.160225	0.127248	0.172376	0.105635	0.144	0.150182	0.166357	0.158608	0.138033	0.1584	0.125048
	0.104995	0.108863	0.144913	0.157482	0.173394	0.153417	0.125831	0.170821	0.105503	0.137826	0.153671	0.150984	0.159808	0.130765	0.16089	0.117148
	0.100249	0.112475	0.14306	0.125167	0.167941	0.143275	0.123432	0.17176	0.10731	0.128629	0.157235	0.169464	0.162833	0.13231	0.16169	0.125249
	0.095959	0.121561	0.140567	0.127763	0.1562	0.139912	0.118775	0.170019	0.10593	0.135236	0.157194	0.201034	0.164436	0.127199	0.162301	0.127193
	0.096037	0.110096	0.133835	0.145184	0.142606	0.135652	0.113483	0.159963	0.102807	0.125185	0.154518	0.188477	0.167541	0.121547	0.160636	0.127471
	0.098864	0.120672	0.130052	0.134213	0.132906	0.144274	0.106004	0.148806	0.103539	0.115952	0.152576	0.165745	0.169112	0.119766	0.158644	0.131215
	0.104694	0.114603	0.127515	0.115896	0.125821	0.155381	0.100138	0.14634	0.107741	0.119229	0.155945	0.154779	0.16983	0.118485	0.156096	0.138601
	0.107333	0.127537	0.128738	0.121704	0.125062	0.170512	0.098666	0.143822	0.113815	0.12103	0.160223	0.15729	0.171456	0.126788	0.1545	0.130938
	0.109229	0.145795	0.13479	0.138754	0.121705	0.189623	0.096494	0.130377	0.115277	0.119482	0.157527	0.152928	0.174104	0.124613	0.155296	0.141466
	0.109981	0.153178	0.139165	0.13259	0.114412	0.186787	0.093071	0.130745	0.111296	0.115555	0.148725	0.127408	0.176386	0.129788	0.15661	0.136751
	0.110441	0.154894	0.141708	0.125477	0.105329	0.191351	0.088006	0.13091	0.105124	0.118293	0.140176	0.107392	0.174941	0.140666	0.152516	0.145353
	0.111071	0.149646	0.14949	0.131967	0.09593	0.190344	0.082074	0.125294	0.102168	0.111359	0.135143	0.098413	0.173266	0.132164	0.139715	0.165503
	0.114151	0.168924	0.150685	0.135667	0.086943	0.20374	0.074063	0.137916	0.101288	0.111927	0.137127	0.093573	0.168373	0.138936	0.124811	0.164928
	0.117795	0.17239	0.143524	0.127441	0.079388	0.21079	0.065802	0.135804	0.099569	0.116422	0.139947	0.084993	0.162713	0.12442	0.109624	0.170356
	0.122908	0.162639	0.137832	0.126155	0.076391	0.189956	0.055698	0.137301	0.10217	0.112372	0.135763	0.080197	0.157242	0.12546	0.097987	0.162587
	0.12699	0.156448	0.145836	0.130598	0.077537	0.201111	0.044856	0.150603	0.103878	0.120738	0.128401	0.080728	0.151849	0.131245	0.08832	0.166084
	0.124122	0.14999	0.155118	0.138766	0.078196	0.201031	0.037298	0.143397	0.10407	0.120619	0.12151	0.084072	0.144766	0.130915	0.078307	0.158593
	0.112676	0.124808	0.166749	0.141818	0.076624	0.203552	0.030945	0.137405	0.098619	0.12894	0.111314	0.081128	0.134494	0.133669	0.066588	0.167504
	0.102003	0.13506	0.173543	0.149098	0.071072	0.19787	0.024122	0.150933	0.088729	0.133576	0.103473	0.069188	0.121353	0.116831	0.050969	0.163785
	0.093674	0.133328	0.168659	0.147856	0.064567	0.203571	0.016027	0.165021	0.082568	0.138661	0.102317	0.069409	0.104993	0.120079	0.034821	0.162851
	0.094049	0.127607	0.15967	0.155308	0.057635	0.216456	0.007934	0.16573	0.078349	0.14288	0.101053	0.070729	0.09064	0.116373	0.016602	0.155456
	0.095189	0.125581	0.157523	0.155614	0.053416	0.209566	-0.001072	0.162402	0.076328	0.140961	0.098637	0.090031	0.079976	0.116518	0.002878	0.147739
	0.094665	0.129547	0.157169	0.152289	0.05231	0.210011	-0.008125	0.155094	0.070747	0.139341	0.097448	0.088738	0.070821	0.112946	-0.005131	0.139702
	0.090141	0.127007	0.157377	0.159842	0.053198	0.215695	-0.014981	0.156195	0.064675	0.146279	0.091845	0.083461	0.059959	0.108885	-0.009656	0.135043
	0.085145	0.11867	0.16772	0.18151	0.051477	0.218443	-0.019214	0.153634	0.058963	0.143104	0.08285	0.089633	0.046943	0.105322	-0.015197	0.127861
	0.087652	0.130705	0.16723	0.179714	0.047705	0.217153	-0.020695	0.15564	0.05219	0.132112	0.080049	0.093914	0.031304	0.098375	-0.023838	0.12934
	0.091268	0.142189	0.161706	0.171619	0.046257	0.228026	-0.021748	0.163424	0.045793	0.138461	0.080697	0.091451	0.016795	0.097104	-0.033449	0.12665
	0.096951	0.154827	0.157679	0.183965	0.046101	0.229888	-0.025312	0.171498	0.03857	0.126991	0.080149	0.090115	0.006199	0.094232	-0.043813	0.123639
	0.100774	0.157325	0.158009	0.185602	0.052486	0.232481	-0.029315	0.173967	0.038154	0.127937	0.078795	0.09701	-0.001726	0.088885	-0.053136	0.109623
	0.104603	0.155538	0.159576	0.187171	0.059013	0.225442	-0.031082	0.168695	0.040716	0.13335	0.074181	0.096841	-0.007804	0.095957	-0.060343	0.100878
	0.111844	0.170206	0.160976	0.183155	0.064992	0.219656	-0.028917	0.167323	0.040853	0.128069	0.068257	0.091214	-0.012563	0.097847	-0.068002	0.102114
	0.115806	0.162537	0.160376	0.1714	0.068138	0.241522	-0.023752	0.16893	0.038953	0.124626	0.065487	0.107744	-0.019502	0.091201	-0.071719	0.094281
	0.123216	0.154591	0.148215	0.162297	0.071522	0.231023	-0.017856	0.162383	0.035897	0.119727	0.067198	0.112637	-0.029178	0.09064	-0.076039	0.091237
	0.128536	0.155064	0.142563	0.171787	0.07145	0.249466	-0.015548	0.179646	0.035709	0.13521	0.070499	0.118705	-0.039714	0.100198	-0.081058	0.079581
	0.132575	0.150037	0.141715	0.168654	0.069702	0.242068	-0.011913	0.194478	0.038017	0.131342	0.070645	0.12293	-0.047871	0.106557	-0.088145	0.080429
	0.134271	0.141734	0.13977	0.160773	0.072922	0.24299	-0.008202	0.202143	0.042579	0.125173	0.073806	0.134834	-0.053199	0.102714	-0.095314	0.085536
	0.12761	0.144046	0.144597	0.175211	0.071102	0.245885	-0.00461	0.196144	0.046207	0.111956	0.074072	0.134764	-0.055029	0.103096	-0.099615	0.07595
	0.122019	0.135362	0.146829	0.165087	0.067447	0.237549	-0.001833	0.207379	0.049365	0.133119	0.074388	0.135338	-0.055968	0.090452	-0.104577	0.074684
	0.119656	0.144796	0.150195	0.166364	0.06057	0.238969	0.000962	0.202808	0.050663	0.133934	0.074864	0.150375	-0.061881	0.090176	-0.109295	0.075482
	0.12496	0.12843	0.146527	0.17374	0.051165	0.233481	0.001941	0.212175	0.047487	0.137082	0.078601	0.160381	-0.067481	0.087675	-0.115574	0.07315
	0.127792	0.126555	0.144827	0.166368	0.044826	0.247273	-0.001434	0.215741	0.043316	0.118768	0.082864	0.169809	-0.071655	0.081127	-0.120996	0.075634
	0.125239	0.111929	0.141594	0.153191	0.0392	0.233995	-0.007657	0.208748	0.041659	0.121418	0.08156	0.168077	-0.074271	0.073104	-0.12253	0.076589
	0.119404	0.105796	0.142138	0.151126	0.032246	0.237523	-0.017386	0.207734	0.046469	0.117401	0.075097	0.167456	-0.076592	0.07277	-0.12322	0.072331
	0.10872	0.125717	0.155996	0.156075	0.021391	0.236322	-0.028304	0.199232	0.054843	0.125567	0.06421	0.161006	-0.07761	0.07606	-0.123933	0.077096
	0.103658	0.11952	0.169467	0.157299	0.013367	0.217516	-0.037174	0.176478	0.058956	0.128467	0.056799	0.142299	-0.077779	0.077526	-0.12652	0.079282
	0.103867	0.139622	0.179376	0.164709	0.010578	0.214724	-0.042983	0.164963	0.055284	0.139018	0.052417	0.138993	-0.079879	0.072306	-0.127504	0.081933
	0.108796	0.134082	0.184709	0.189743	0.017641	0.227651	-0.048159	0.158594	0.048018	0.118631	0.04875	0.144601	-0.083363	0.063913	-0.125924	0.084652
	0.120763	0.120765	0.18559	0.187619	0.03115	0.231776	-0.052732	0.162805	0.041963	0.103754	0.047515	0.148326	-0.089506	0.064323	-0.125081	0.07961
	0.128442	0.115459	0.183192	0.193566	0.041168	0.259683	-0.056824	0.163114	0.038861	0.112387	0.046958	0.141025	-0.09653	0.068655	-0.123655	0.074686
	0.126618	0.130903	0.17403	0.187605	0.04736	0.263007	-0.061217	0.156102	0.041463	0.108784	0.050111	0.145728	-0.099342	0.06664	-0.124006	0.075451
	0.113542	0.122516	0.169728	0.155207	0.046645	0.254915	-0.066155	0.154987	0.039914	0.117214	0.053056	0.145885	-0.099261	0.066709	-0.121792	0.076833
	0.100274	0.119461	0.17056	0.155944	0.040611	0.249396	-0.071505	0.155057	0.035288	0.113592	0.051983	0.143772	-0.097938	0.067584	-0.118238	0.07724
	0.09401	0.109106	0.177094	0.15221	0.035569	0.250078	-0.076755	0.166139	0.030331	0.10694	0.049663	0.141102	-0.09874	0.069625	-0.11741	0.075961
	0.096788	0.10402	0.18356	0.150277	0.033442	0.241999	-0.080727	0.159157	0.025129	0.107742	0.052942	0.123876	-0.099183	0.078981	-0.118692	0.075369
	0.10453	0.089707	0.181786	0.144469	0.035352	0.23848	-0.07932	0.167702	0.019025	0.104152	0.057512	0.134872	-0.098277	0.071833	-0.119425	0.07145
	0.108921	0.106585	0.173294	0.142863	0.040094	0.234947	-0.074532	0.162829	0.012329	0.121222	0.059906	0.140106	-0.098633	0.081028	-0.116014	0.070963
	0.109543	0.107052	0.168076	0.12674	0.042028	0.241599	-0.071511	0.16383	0.00923	0.129775	0.060002	0.14646	-0.098335	0.082879	-0.11248	0.069095
	0.109102	0.093013	0.162531	0.1207	0.040503	0.235967	-0.065648	0.169371	0.004075	0.124259	0.058974	0.133426	-0.097656	0.078487	-0.105299	0.068906
	0.107707	0.094359	0.166174	0.124327	0.030655	0.227596	-0.062158	0.163122	0.00036	0.122704	0.057174	0.131058	-0.096941	0.072356	-0.100399	0.075781
	0.106184	0.095816	0.172253	0.127375	0.019067	0.223617	-0.063529	0.163549	-0.003305	0.122181	0.054891	0.129535	-0.095789	0.069761	-0.097852	0.09299
	0.103209	0.099997	0.157061	0.127073	0.02549	0.234243	-0.071842	0.151102	-0.010641	0.116404	0.050603	0.128149	-0.0929	0.070813	-0.092076	0.100689

## Sheet: Figure 6
Figure 6
	Figure 6b
	Linear regression (slope=0.9854896575780273, intercept=0.06325193840264387, rvalue=0.3680163486417938, pvalue=7.965030547077619e-192
	Figure 6g								Figure 6h	shocked mean	shocked SEM	control mean	control SEM
	day	shocked mean	shocked standard deviation	control mean	control standard deviation				Gain fraction
	pre-shocks	0.008314	0.077897	0.022336	0.083411				freezing	32.8661	0.615024	37.3878	0.718369
	day 1	0.50749	0.129271	0.266578	0.098721				velocities	23.9877	0.462464	19.5928	0.184774
	day 2	0.36653	0.060176	0.232719	0.067628				interval	21.9524	0.719699	18.428	0.615425
	day 3	0.519014	0.156301	0.278363	0.099227				running	10.9467	0.191879	9.54423	0.305325
									location	3.10699	0.307718	4.63365	0.738353
									pupil	2.85378	1.05818	5.49989	1.37602

## Sheet: Supplementary Figure 1
Supplementary Figure 1
	Supplementary Figure 1a						Supplementary Figure 1b						Supplementary Figure 1d							Supplementary Figure 1f							Supplementary Figure 1h
	context	condition	mouse name		freezing fraction		experimental day	context	freezing fraction	freezing fraction standard deviation			experimental day	context	freezing fraction	freezing fraction standard deviation				experimental day	context	freezing fraction	freezing fraction standard deviation				experimental day	context	freezing fraction	freezing fraction standard deviation
	control	NR-intact	A1	pre-shocks	0.343487		pre-shocks	shocked	0.147813	0.086674			pre-shocks	shocked	0.130915	0.109334				pre-shocks	shocked	0.090787	0.085025				pre-shocks	shocked	0.152851	0.134536
	control	NR-intact	A1	day 1	0.207881		pre-shocks	control	0.240192	0.203176			pre-shocks	control	0.158942	0.127043				pre-shocks	control	0.169949	0.206839				pre-shocks	control	0.199318	0.137765
	control	NR-intact	A1	day 2	0.453178		day 1	shocked	0.74372	0.135748			day 1	shocked	0.475564	0.137383				day 1	shocked	0.064094	0.088754				day 1	shocked	0.422168	0.10299
	control	NR-intact	A1	day 3	0.247385		day 1	control	0.550049	0.163259			day 1	control	0.259681	0.155062				day 1	control	0.15605	0.098811				day 1	control	0.256565	0.150684
	control	NR-intact	A2	pre-shocks	0.14521		day 2	shocked	0.628619	0.10109			day 2	shocked	0.427103	0.168264				day 2	shocked	0.059544	0.057829				day 2	shocked	0.491164	0.143785
	control	NR-intact	A2	day 1	0.069665		day 2	control	0.395408	0.236858			day 2	control	0.311782	0.216767				day 2	control	0.092357	0.068287				day 2	control	0.432788	0.183143
	control	NR-intact	A2	day 2	0.631157		day 3	shocked	0.36674	0.140517			day 3	shocked	0.273225	0.198432				day 3	shocked	0.079083	0.080126				day 3	shocked	0.326453	0.206828
	control	NR-intact	A2	day 3	0.343167		day 3	control	0.321252	0.226237			day 3	control	0.221422	0.172466				day 3	control	0.08715	0.09967				day 3	control	0.253239	0.175021
	control	NR-intact	A4	pre-shocks	0.189499
	control	NR-intact	A4	day 1	0.370579
	control	NR-intact	A4	day 2	0.468687		Supplementary Figure 1c						Supplementary Figure 1e							Supplementary Figure 1g
	control	NR-intact	A4	day 3	0.117612			mean freeze length	mean standard deviation				day	experiment	context	Lap status	mean	standard deviation		experimental day	context	freezing fraction mcherry	freezing fraction mcherry standard deviation	freezing fraction saline	freezing fraction saline standard deviation
	control	NR-intact	B8	pre-shocks	0.081288		nr intact shocked	19.6183	15.3443				pre-shocks	NR-intact	shocked	Non-first lap	0.023843	0.152562		pre-shocks	shocked	0.269629	0.045914	0.239336	0.148452
	control	NR-intact	B8	day 1	0.20177		nr intact control	12.1886	8.71448				pre-shocks	NR-intact	shocked	First lap	0.011243	0.105472		pre-shocks	control	0.214853	0.173297	0.20606	0.146858
	control	NR-intact	B8	day 2	0.222312		unshocked 'shocked'	0.0624128	0.186754				day 1	NR-intact	shocked	Non-first lap	0.026608	0.160935		day 1	shocked	0.473646	0.281929	0.500922	0.343962
	control	NR-intact	B8	day 3	0.107668		unshocked 'control'	0.0757945	0.182979				day 1	NR-intact	shocked	First lap	0.040806	0.197866		day 1	control	0.232646	0.190714	0.229317	0.179662
	control	NR-intact	C10	pre-shocks	0.071227		nr inhibited shocked	35.0941	10.698				day 2	NR-intact	shocked	Non-first lap	0.040828	0.197892		day 2	shocked	0.420201	0.231328	0.411387	0.101005
	control	NR-intact	C10	day 1	0.223833		nr inhibited control	21.6173	12.9371				day 2	NR-intact	shocked	First lap	0.063423	0.243749		day 2	control	0.242037	0.219685	0.266611	0.093388
	control	NR-intact	C10	day 2	0.080346								day 3	NR-intact	shocked	Non-first lap	0.025996	0.159124		day 3	shocked	0.354037	0.115998	0.350616	0.114899
	control	NR-intact	C10	day 3	0.032635								day 3	NR-intact	shocked	First lap	0.047018	0.211714		day 3	control	0.236153	0.101564	0.254629	0.1042
	control	NR-intact	C4	pre-shocks	0.314194
	control	NR-intact	C4	day 1	0.684358
	control	NR-intact	C4	day 2	0.654786
	control	NR-intact	C4	day 3	0.569998
	control	NR-intact	C7	pre-shocks	0.145565
	control	NR-intact	C7	day 1	0.381172
	control	NR-intact	C7	day 2	0.203059
	control	NR-intact	C7	day 3	0.152266
	control	NR-intact	E5	pre-shocks	0.035585
	control	NR-intact	E5	day 1	0.297368
	control	NR-intact	E5	day 2	0.205912
	control	NR-intact	E5	day 3	0.125829
	control	NR-intact	MR3a	pre-shocks	0.159233
	control	NR-intact	MR3a	day 1	0.241511
	control	NR-intact	MR3a	day 2	0.112366
	control	NR-intact	MR3a	day 3	0.044628
	control	NR-intact	MR3e	pre-shocks	0.248442
	control	NR-intact	MR3e	day 1	0.126991
	control	NR-intact	MR3e	day 2	0.029334
	control	NR-intact	MR3e	day 3	0.047725
	control	NR-intact	MR4d	pre-shocks	0.013934
	control	NR-intact	MR4d	day 1	0.189843
	control	NR-intact	MR4d	day 2	0.212091
	control	NR-intact	MR4d	day 3	0.28557
	control	NR-intact	MR5b	pre-shocks	0.275772
	control	NR-intact	MR5b	day 1	0.464042
	control	NR-intact	MR5b	day 2	0.143204
	control	NR-intact	MR5b	day 3	0.153939
	control	NR-intact	MR6a	pre-shocks	0.005439
	control	NR-intact	MR6a	day 1	0.147647
	control	NR-intact	MR6a	day 2	0.223787
	control	NR-intact	MR6a	day 3	0.353757
	control	NR-intact	MR6b	pre-shocks	0.090781
	control	NR-intact	MR6b	day 1	0.191519
	control	NR-intact	MR6b	day 2	0.294862
	control	NR-intact	MR6b	day 3	0.402246
	control	NR-intact	MR6e	pre-shocks	0.033905
	control	NR-intact	MR6e	day 1	0.251859
	control	NR-intact	MR6e	day 2	0.619812
	control	NR-intact	MR6e	day 3	0.090946
	control	NR-intact	MR7c	pre-shocks	0.092407
	control	NR-intact	MR7c	day 1	0.011089
	control	NR-intact	MR7c	day 2	0.383039
	control	NR-intact	MR7c	day 3	0.133709
	control	NR-intact	MR7e	pre-shocks	0.275266
	control	NR-intact	MR7e	day 1	0.359083
	control	NR-intact	MR7e	day 2	0.404307
	control	NR-intact	MR7e	day 3	0.290135
	control	NR-intact	MR8a	pre-shocks	0.019111
	control	NR-intact	MR8a	day 1	0.13399
	control	NR-intact	MR8a	day 2	0
	control	NR-intact	MR8a	day 3	0.062638
	control	NR-intact	MR8c	pre-shocks	0.172934
	control	NR-intact	MR8c	day 1	0.20125
	control	NR-intact	MR8c	day 2	0.186089
	control	NR-intact	MR8c	day 3	0.221012
	control	NR-intact	RE6e	pre-shocks	0.465566
	control	NR-intact	RE6e	day 1	0.438166
	control	NR-intact	RE6e	day 2	0.707322
	control	NR-intact	RE6e	day 3	0.645582
	shocked	NR-intact	A1	pre-shocks	0.176541
	shocked	NR-intact	A1	day 1	0.468982
	shocked	NR-intact	A1	day 2	0.463312
	shocked	NR-intact	A1	day 3	0.342771
	shocked	NR-intact	A2	pre-shocks	0
	shocked	NR-intact	A2	day 1	0.357802
	shocked	NR-intact	A2	day 2	0.519223
	shocked	NR-intact	A2	day 3	0.645833
	shocked	NR-intact	A4	pre-shocks	0.081005
	shocked	NR-intact	A4	day 1	0.272435
	shocked	NR-intact	A4	day 2	0.493663
	shocked	NR-intact	A4	day 3	0.163984
	shocked	NR-intact	B8	pre-shocks	0.146567
	shocked	NR-intact	B8	day 1	0.401565
	shocked	NR-intact	B8	day 2	0.291826
	shocked	NR-intact	B8	day 3	0.036708
	shocked	NR-intact	C10	pre-shocks	0.06377
	shocked	NR-intact	C10	day 1	0.467122
	shocked	NR-intact	C10	day 2	0.227721
	shocked	NR-intact	C10	day 3	0.098628
	shocked	NR-intact	C4	pre-shocks	0.259081
	shocked	NR-intact	C4	day 1	0.657452
	shocked	NR-intact	C4	day 2	0.67988
	shocked	NR-intact	C4	day 3	0.583217
	shocked	NR-intact	C7	pre-shocks	0.042944
	shocked	NR-intact	C7	day 1	0.569882
	shocked	NR-intact	C7	day 2	0.312676
	shocked	NR-intact	C7	day 3	0.184052
	shocked	NR-intact	E5	pre-shocks	0.07598
	shocked	NR-intact	E5	day 1	0.514257
	shocked	NR-intact	E5	day 2	0.378063
	shocked	NR-intact	E5	day 3	0.016308
	shocked	NR-intact	MR3a	pre-shocks	0.170491
	shocked	NR-intact	MR3a	day 1	0.635032
	shocked	NR-intact	MR3a	day 2	0.340644
	shocked	NR-intact	MR3a	day 3	0.050697
	shocked	NR-intact	MR3e	pre-shocks	0.043978
	shocked	NR-intact	MR3e	day 1	0.330508
	shocked	NR-intact	MR3e	day 2	0.081802
	shocked	NR-intact	MR3e	day 3	0.082103
	shocked	NR-intact	MR4d	pre-shocks	0.144097
	shocked	NR-intact	MR4d	day 1	0.434923
	shocked	NR-intact	MR4d	day 2	0.441224
	shocked	NR-intact	MR4d	day 3	0.318283
	shocked	NR-intact	MR5b	pre-shocks	0.30625
	shocked	NR-intact	MR5b	day 1	0.600842
	shocked	NR-intact	MR5b	day 2	0.5477
	shocked	NR-intact	MR5b	day 3	0.296431
	shocked	NR-intact	MR6a	pre-shocks	0.02743
	shocked	NR-intact	MR6a	day 1	0.838606
	shocked	NR-intact	MR6a	day 2	0.361078
	shocked	NR-intact	MR6a	day 3	0.217776
	shocked	NR-intact	MR6b	pre-shocks	0.151167
	shocked	NR-intact	MR6b	day 1	0.371233
	shocked	NR-intact	MR6b	day 2	0.322289
	shocked	NR-intact	MR6b	day 3	0.359711
	shocked	NR-intact	MR6e	pre-shocks	0.093113
	shocked	NR-intact	MR6e	day 1	0.398431
	shocked	NR-intact	MR6e	day 2	0.684042
	shocked	NR-intact	MR6e	day 3	0.269486
	shocked	NR-intact	MR7c	pre-shocks	0
	shocked	NR-intact	MR7c	day 1	0.406106
	shocked	NR-intact	MR7c	day 2	0.418441
	shocked	NR-intact	MR7c	day 3	0.239791
	shocked	NR-intact	MR7e	pre-shocks	0.133065
	shocked	NR-intact	MR7e	day 1	0.358236
	shocked	NR-intact	MR7e	day 2	0.423201
	shocked	NR-intact	MR7e	day 3	0.203298
	shocked	NR-intact	MR8a	pre-shocks	0.068903
	shocked	NR-intact	MR8a	day 1	0.471849
	shocked	NR-intact	MR8a	day 2	0.575897
	shocked	NR-intact	MR8a	day 3	0.462048
	shocked	NR-intact	MR8c	pre-shocks	0.193113
	shocked	NR-intact	MR8c	day 1	0.369976
	shocked	NR-intact	MR8c	day 2	0.231433
	shocked	NR-intact	MR8c	day 3	0.18686
	shocked	NR-intact	RE6e	pre-shocks	0.440804
	shocked	NR-intact	RE6e	day 1	0.586047
	shocked	NR-intact	RE6e	day 2	0.747945
	shocked	NR-intact	RE6e	day 3	0.70652

## Sheet: Supplementary Figure 2
Supplementary Figure 2
Supplementary Figure 2b					Supplementary Figure 2e
	count	mean	standard deviation			count	mean	standard deviation
fear	352	17.517	10.6578		fear	134	16.1343	10.698
safe	275	22.0655	16.123		safe	162	21.6173	12.9371
Supplementary Figure 2c					Supplementary Figure 2f
	count	mean	standard deviation			count	mean	standard deviation
fear	383	20.9843	14.5267		fear	235	35.0638	15.7426
safe	314	20.9268	13.1262		safe	199	19.3367	16.0212
Supplementary Figure 2d					Supplementary Figure 2g
	count	mean	standard deviation			count	mean	standard deviation
fear	290	23.7207	20.3218		fear	209	20.8469	15.3556
safe	282	20.8262	15.2657		safe	215	33.0837	17.3817

## Sheet: Supplementary Figure 3
Supplementary Figure 3
	Supplementary Figure 3a						Supplementary Figure 3e
	pre-shocks	slope=0.05655791551117254, intercept=0.2547472937260364, rvalue=0.10053817461613819, pvalue=0.2355410123010169					Top: shocked context mean	Top: shocked context standard deviation	Top: control context mean	Top: control context standard deviation	Upper middle: shocked context mean	Upper middle: shocked context standard deviation	Upper middle: control context mean	Upper middle: control context standard deviation	Lower middle: shocked context mean	Lower middle: shocked context standard deviation	Lower middle: control context mean	Lower middle: control context standard deviation	Bottom middle: shocked context mean	Bottom: shocked context standard deviation	Bottom: control context mean	Bottom: control context standard deviation
	day 1	slope=-0.015798077215457083, intercept=0.3316192396661332, rvalue=-0.02331113378043292, pvalue=0.706162430031029					0.043442	0.153717	0.115268	0.16792	0.00092	0.090396	0.151499	0.157314	0.221173	0.136159	0.136907	0.158802	0.107127	0.096712	0.155714	0.210707
	day 2	slope=-0.031143913585296664, intercept=0.3063429864173122, rvalue=-0.056797061973014235, pvalue=0.2935147380588324					0.043945	0.156486	0.122121	0.171734	0.022504	0.098136	0.157793	0.157046	0.189512	0.114081	0.142311	0.151673	0.115122	0.095295	0.163362	0.223841
	day 3	slope=-0.0016779611936347386, intercept=0.2819916446951164, rvalue=-0.0022493043745828996, pvalue=0.9713753649354092					0.039779	0.148496	0.12653	0.172123	0.027051	0.110936	0.157881	0.160469	0.173694	0.10048	0.150884	0.162405	0.126311	0.125665	0.173356	0.224956
							0.038392	0.14599	0.129124	0.171322	0.026987	0.112398	0.157713	0.154925	0.164429	0.077942	0.15675	0.15722	0.144631	0.123804	0.181993	0.221439
	Supplementary Figure 3b						0.041234	0.136403	0.130919	0.170694	0.028682	0.112013	0.159423	0.150657	0.157525	0.082112	0.158729	0.163337	0.164988	0.113718	0.187715	0.227421
	coefficients	79.57217494, -31.93768098, 44.16071894					0.047642	0.144507	0.134438	0.166905	0.036687	0.123402	0.164128	0.153363	0.147515	0.093621	0.158957	0.167329	0.176755	0.121589	0.191802	0.212289
	residuals	295091					0.051448	0.148293	0.138052	0.170802	0.046406	0.132278	0.165828	0.157169	0.158219	0.108141	0.159487	0.180041	0.167456	0.143422	0.190533	0.204799
	rank	3					0.054493	0.147762	0.141638	0.174498	0.054261	0.126452	0.167468	0.15951	0.162224	0.123668	0.160332	0.181448	0.157315	0.123419	0.187207	0.201592
	singular values	1.65107806, 0.51150349, 0.11092978					0.066062	0.156533	0.143059	0.178073	0.062606	0.12336	0.166062	0.175445	0.163881	0.100179	0.160497	0.174026	0.153652	0.135694	0.186758	0.212272
	rcond	3.13083e-14					0.080008	0.174458	0.143335	0.173045	0.070782	0.133854	0.167831	0.187801	0.1523	0.080582	0.157734	0.178368	0.156517	0.139718	0.18427	0.212013
							0.090488	0.179188	0.140371	0.174835	0.078675	0.153817	0.172414	0.190522	0.13348	0.050867	0.158655	0.17545	0.164384	0.14749	0.183346	0.207343
	Supplementary Figure 3c						0.095156	0.197296	0.13355	0.169529	0.082177	0.163613	0.174656	0.185918	0.123628	0.037815	0.161116	0.184199	0.159265	0.137609	0.185911	0.207044
	coefficients	-73.56638716, 179.61106918, 5.87073822					0.09335	0.168178	0.12919	0.170405	0.083997	0.154599	0.175343	0.18666	0.133638	0.064984	0.164904	0.186438	0.150116	0.124524	0.188404	0.199616
	residuals	1.47846e+06					0.088988	0.169755	0.124284	0.168658	0.089992	0.162238	0.175655	0.191132	0.153003	0.077333	0.170944	0.173646	0.141669	0.129403	0.191002	0.206527
	rank	3					0.085954	0.171763	0.120538	0.167547	0.096015	0.165905	0.175411	0.185603	0.166338	0.091396	0.176464	0.18225	0.128912	0.142273	0.193157	0.202886
	singular values	1.6350747 , 0.55700106, 0.12759517					0.090046	0.174247	0.116799	0.170038	0.097342	0.17602	0.175969	0.185931	0.1757	0.085255	0.179675	0.177345	0.111298	0.15618	0.19672	0.206895
	rcond	5.86198e-14					0.090673	0.171345	0.113512	0.170089	0.086883	0.156838	0.178792	0.189341	0.180104	0.102043	0.180892	0.169271	0.097904	0.160836	0.198723	0.212365
							0.09236	0.15754	0.109445	0.172814	0.071351	0.146927	0.179254	0.189566	0.18943	0.103091	0.181678	0.165424	0.098074	0.13686	0.202676	0.21606
	Supplementary Figure 3d						0.090661	0.161799	0.103943	0.172591	0.062067	0.14839	0.176405	0.195987	0.194431	0.094213	0.185406	0.153258	0.101485	0.161863	0.206147	0.215927
		pre-shocks mean	pre-shocks standard deviation	post-shocks mean	post-shocks standard deviation		0.082921	0.146044	0.09953	0.176946	0.062092	0.13745	0.174151	0.196509	0.194249	0.066204	0.192097	0.15694	0.101663	0.150782	0.208681	0.210224
	0-20%	0.202115	0.200405	0.186635	0.169191		0.077304	0.137955	0.092617	0.17636	0.066225	0.156794	0.165568	0.196232	0.196093	0.053422	0.199243	0.15192	0.088536	0.155149	0.213812	0.211055
	20-40%	0.17506	0.168734	0.251901	0.208858		0.071733	0.134739	0.088194	0.18201	0.071543	0.167151	0.156412	0.188435	0.199456	0.040766	0.202957	0.159438	0.072952	0.152929	0.216984	0.220534
	40-60%	0.14723	0.204577	0.250734	0.178356		0.070357	0.13139	0.084976	0.184537	0.071492	0.174311	0.151211	0.188996	0.201246	0.063216	0.203816	0.141498	0.067459	0.140199	0.220529	0.229625
	60-80%	0.138201	0.141014	0.24287	0.217862		0.072161	0.141346	0.080676	0.179756	0.067446	0.167445	0.148339	0.188941	0.198958	0.078984	0.201321	0.137062	0.066411	0.144872	0.222117	0.221802
	80-100%	0.140162	0.210014	0.235585	0.149196		0.074874	0.140525	0.074859	0.18893	0.057695	0.16148	0.142446	0.190115	0.190535	0.0959	0.195884	0.136981	0.065559	0.158385	0.22223	0.221289
							0.076348	0.145078	0.071014	0.188448	0.045617	0.171699	0.134916	0.182771	0.1698	0.080502	0.190189	0.145623	0.065858	0.150037	0.223378	0.224356
							0.078529	0.134408	0.063579	0.180447	0.029574	0.166827	0.124728	0.174696	0.150294	0.116857	0.183518	0.142767	0.068197	0.163268	0.224437	0.220362
							0.079381	0.13368	0.058072	0.180032	0.028331	0.16935	0.111503	0.163317	0.132843	0.147659	0.179077	0.129506	0.069895	0.173052	0.22501	0.221681
							0.079839	0.140618	0.055095	0.179076	0.04148	0.170097	0.101086	0.161531	0.107516	0.121402	0.176359	0.127482	0.064999	0.164731	0.222996	0.235628
							0.082834	0.145715	0.052556	0.177137	0.058681	0.166857	0.090834	0.157662	0.096254	0.121229	0.174135	0.120914	0.054372	0.176667	0.219049	0.227497
											0.069898	0.199369	0.079312	0.158289	0.089399	0.097725	0.173452	0.121474	0.041222	0.153087	0.214337	0.224257
											0.072174	0.192249	0.070859	0.158262	0.082735	0.076614	0.174613	0.117436	0.039049	0.141921	0.20964	0.220567
											0.068121	0.197114	0.064876	0.160307	0.086158	0.083394	0.175315	0.112735	0.041509	0.144163	0.206268	0.217975
											0.066568	0.219827	0.057351	0.169309	0.096819	0.084363	0.174976	0.118335	0.041321	0.146491	0.20152	0.211113
											0.072606	0.225246	0.048018	0.166762	0.096292	0.080087	0.174387	0.122202	0.044607	0.128129	0.196176	0.213885
											0.087398	0.19851	0.040633	0.16784	0.103427	0.056437	0.17289	0.129274	0.049522	0.109126	0.188744	0.209929
											0.108007	0.203659	0.031464	0.166521	0.123647	0.049092	0.174444	0.128487	0.05371	0.1188	0.181838	0.205408
											0.131081	0.196704	0.023118	0.164622	0.144123	0.05757	0.177429	0.136891	0.053819	0.123399	0.17588	0.199613
											0.141111	0.216299	0.015576	0.15942	0.166989	0.092157	0.179307	0.144523	0.054501	0.126741	0.169705	0.184141
											0.1359	0.186855	0.007025	0.155301	0.191812	0.101827	0.179567	0.145592	0.056138	0.116234	0.166412	0.176015
											0.122248	0.1789	0.000706	0.152018	0.194923	0.088925	0.175011	0.153597	0.060585	0.117367	0.165969	0.174678
											0.112624	0.137927	-0.00384	0.141057	0.188615	0.103066	0.164064	0.16429	0.068844	0.130668	0.167331	0.169941
											0.118012	0.137644	-0.008544	0.140199	0.190698	0.114772	0.149868	0.161112	0.067352	0.132407	0.172116	0.173955
											0.126461	0.119528	-0.017868	0.140139	0.184072	0.124313	0.138565	0.161864	0.057918	0.100781	0.175371	0.177
											0.130938	0.129749	-0.027291	0.141842	0.174582	0.135554	0.131248	0.164689	0.044448	0.12636	0.174527	0.178666
											0.127153	0.121281	-0.03432	0.137938	0.172349	0.122115	0.127469	0.165607	0.026754	0.113762	0.173974	0.180683
											0.12236	0.122128	-0.038204	0.130146	0.160991	0.082942	0.124038	0.161801	0.012686	0.098151	0.172847	0.175793
											0.111299	0.123237	-0.039037	0.138737	0.142672	0.077894	0.114444	0.152465	0.003248	0.077752	0.171796	0.1839
											0.100855	0.134099	-0.040259	0.141853	0.127378	0.088824	0.101352	0.146261	0.002891	0.07117	0.17206	0.189764
											0.095862	0.13288	-0.042844	0.139981	0.123443	0.070859	0.086962	0.147346	0.00217	0.063387	0.177679	0.198707
											0.092543	0.128626	-0.046195	0.139879	0.12062	0.044135	0.072798	0.143723	-0.001541	0.060552	0.183109	0.204467
											0.090155	0.129998	-0.049479	0.142512	0.112348	0.049578	0.063172	0.138211	-0.009812	0.062023	0.186013	0.218435
											0.092166	0.132889	-0.05155	0.14381	0.105315	0.083322	0.056153	0.122759	-0.016024	0.080591	0.185784	0.221395
											0.085239	0.1151	-0.053559	0.143784	0.098605	0.086569	0.052188	0.117608	-0.013835	0.073885	0.178677	0.215594
											0.070038	0.12004	-0.05318	0.153815	0.107138	0.080824	0.046658	0.126815	-0.00481	0.088939	0.172397	0.221948
											0.062124	0.115704	-0.05276	0.151212	0.119419	0.135075	0.039292	0.126073	0.01061	0.0901	0.168631	0.226174
											0.04872	0.115867	-0.053007	0.149006	0.128685	0.141289	0.02912	0.129983	0.024598	0.116354	0.166463	0.228944
											0.040487	0.127977	-0.055702	0.149731	0.134134	0.130302	0.019097	0.13377	0.033957	0.142056	0.162596	0.230783
											0.033834	0.12576	-0.060065	0.137739	0.136668	0.138093	0.011597	0.120985	0.04093	0.14697	0.15824	0.21261
											0.015135	0.13814	-0.061808	0.131281	0.143608	0.118919	0.007981	0.130415	0.049591	0.161504	0.151136	0.217097
															0.135103	0.11456	0.007028	0.148708	0.057011	0.185909	0.13485	0.197364
															0.120452	0.08504	0.007163	0.147254	0.066781	0.17187	0.114751	0.186581
															0.118625	0.079002	0.005272	0.173947	0.077588	0.169012	0.09605	0.172234
															0.119956	0.077247	0.004672	0.176697	0.086326	0.154984	0.081887	0.165674
															0.121517	0.069344	0.00337	0.17946	0.092076	0.181043	0.073239	0.159471
															0.10655	0.072549	0.002525	0.173338	0.095526	0.159088	0.067502	0.151383
															0.093244	0.067583	0.002807	0.172899	0.100495	0.15971	0.060884	0.148863
															0.088779	0.086284	-0.000342	0.180308	0.104576	0.159155	0.05296	0.152745
															0.093615	0.108386	-0.003509	0.178006	0.110531	0.193884	0.045322	0.148035
															0.100444	0.1309	-0.004949	0.187008	0.117967	0.204728	0.03606	0.14075
															0.093805	0.082624	-0.006216	0.177548	0.118861	0.200044	0.02799	0.133356
															0.085221	0.067653	-0.008249	0.193435	0.115549	0.206558	0.025666	0.125344
															0.064413	0.07728	-0.011503	0.198415	0.10721	0.223856	0.02759	0.128517
															0.046914	0.080259	-0.018027	0.182963	0.100437	0.226795	0.028775	0.14302
															0.045943	0.064196	-0.027239	0.185885	0.095155	0.224297	0.025594	0.133948
															0.052067	0.072018	-0.034958	0.184401	0.09412	0.202323	0.020797	0.131857
															0.068592	0.073352	-0.039439	0.174937	0.099134	0.207636	0.01737	0.125791
															0.074449	0.074883	-0.044477	0.181138	0.101201	0.185764	0.017376	0.140031
															0.066984	0.05401	-0.044927	0.182164	0.102694	0.211755	0.017431	0.151608
															0.050988	0.069191	-0.047449	0.196047	0.099746	0.198185	0.019211	0.159101
															0.042658	0.053128	-0.051116	0.181069	0.09461	0.185652	0.017568	0.160987
															0.047225	0.058183	-0.054528	0.183034	0.089401	0.165832	0.013248	0.165442
															0.057369	0.068854	-0.055923	0.162968	0.091751	0.169627	0.009142	0.169665
															0.088752	0.0873	-0.05582	0.161041	0.104638	0.150682	0.003774	0.172608
															0.123064	0.096159	-0.054596	0.176451	0.117246	0.147577	-0.00027	0.171351
															0.140078	0.113049	-0.053224	0.173107	0.125281	0.141984	-0.002578	0.173768
															0.159322	0.096109	-0.050289	0.175269	0.135466	0.165025	-0.004546	0.175223
															0.154993	0.113821	-0.047991	0.184376	0.145986	0.158133	-0.010949	0.171416
															0.144361	0.101943	-0.04673	0.186188	0.158117	0.163988	-0.01645	0.166782
															0.181109	0.116464	-0.045559	0.182226	0.160033	0.167973	-0.020322	0.155079
																			0.154777	0.154994	-0.02426	0.151205
																			0.150299	0.15236	-0.0243	0.152744
																			0.148757	0.158723	-0.021541	0.155585
																			0.143514	0.168452	-0.017765	0.155345
																			0.131011	0.17347	-0.014584	0.154479
																			0.120366	0.182385	-0.011985	0.158155
																			0.113816	0.17392	-0.012382	0.157919
																			0.110446	0.185159	-0.014881	0.156582
																			0.097253	0.179697	-0.012843	0.16319
																			0.077001	0.167744	-0.009343	0.167044
																			0.068789	0.137793	-0.005979	0.192063
																			0.077361	0.146041	-0.002816	0.196247
																			0.088586	0.134184	-0.002747	0.194335
																			0.094762	0.117368	-0.004511	0.191354
																			0.095326	0.118779	-0.006119	0.197397
																			0.091581	0.092648	-0.005069	0.217764
																			0.087699	0.087551	-0.004783	0.228429
																			0.077408	0.076124	-0.003684	0.213304
																			0.061022	0.074983	-0.00284	0.201001
																			0.052648	0.085395	-0.004113	0.187608
																			0.050435	0.074329	-0.006471	0.184023
																			0.049478	0.083625	-0.009348	0.160731
																			0.046498	0.090294	-0.012107	0.169403
																			0.038031	0.081119	-0.015216	0.166745
																			0.032459	0.091398	-0.017803	0.161224
																			0.03327	0.098916	-0.019269	0.155998
																			0.042913	0.094259	-0.02288	0.153255
																			0.060585	0.100052	-0.027737	0.153577
																			0.075333	0.107055	-0.033761	0.149974
																			0.064773	0.089743	-0.040002	0.151944

## Sheet: Supplementary Figure 4
Supplementary Figure 4
		Supplementary Figure 4b
			means:	location	is frozen	velocity	interval elapsed	interval remaining	interval progress	running progress	velocity in 1s	velocity in 0.5s	running elapsed	velocity 0.5s ago	running remaining	freezing elapsed	freeze progress	is running	freeze remaining remaining	velocity 1s ago	acceleration	is post-freeze	freeze	lick	pupil horizontal position	pupil vertical position	pupil area smoothed	is backtracking
		day	context
		pre-shocks	shocked	0.106336	0.293457	0.045917	0.183978	0.155254	0.034646	0.030767	0.039704	0.022566	0.007919	0.001529	0.006248	0.007228	0.001546	6.5e-05	0.010689	0.002269	0	5e-06	0	0	0.003155	0.014168	0.032554	0
		pre-shocks	control	0.248661	0.067826	0.006908	0.152242	0.172529	0.081156	0.03657	0.013106	0.027551	0.023452	0.004393	0.020507	0.028249	0.044928	9e-06	0.036829	0.013647	0.00085	0.000143	0.000921	0	0.003929	0.006954	0.00864	0
		day 1	shocked	0.195416	0.125005	0.006403	0.109745	0.084614	0.022709	0.022221	0.043302	0.037801	0.05398	0.009508	0.019349	0.063225	0.064779	0.000299	0.055876	0.009005	0.017337	0.000515	4e-06	0	0.017611	0.029559	0.011733	4e-06
		day 1	control	0.111368	0.208943	0.014401	0.106738	0.057189	0.026287	0.127832	0.027104	0.066155	0.069246	0.013299	0.006774	0.059588	0.022754	1.6e-05	0.010811	0.01329	0.018115	0.000681	0	7.6e-05	0.008343	0.012795	0.018195	0
		day 2	shocked	0.224788	0.130075	0.00777	0.127107	0.089297	0.024003	0.04297	0.053914	0.044875	0.064016	0.005367	0.05916	0.050575	0.01175	0.001141	0.042169	0.008119	0.000253	0.001445	0	0	0.002041	0.006043	0.00173	0.001391
		day 2	control	0.15674	0.16063	0.010927	0.121433	0.09105	0.036387	0.078678	0.061984	0.029121	0.06432	0.001026	0.001121	0.09887	0.028575	4.8e-05	0.053673	0.000392	3.1e-05	0.000198	0	0	0.003249	0.00028	0.000156	0.001113
		day 3	shocked	0.132349	0.1676	0.005157	0.095573	0.102664	0.019594	0.025911	0.059246	0.043569	0.079596	0.002879	0.037207	0.029698	0.050758	0.003824	0.022561	0.010425	0.012399	0.000166	3e-06	0.000594	0.050812	0.014787	0.032625	0
		day 3	control	0.138677	0.109449	0.004181	0.099607	0.108017	0.031031	0.070372	0.065616	0.031384	0.03264	0.017204	0.040425	0.101765	0.009355	5e-05	0.032045	0.016586	0.005893	0.001118	1.9e-05	0.00163	0.021113	0.022422	0.0394	0
		Supplementary Figure 4c
				mean	standar deviation
		pre-shocks	shocked	0.094607	0.086445
		pre-shocks	control	0.085471	0.028184
		day 1	shocked	0.243717	0.06273
		day 1	control	0.171674	0.029624
		day 2	shocked	0.183991	0.087761
		day 2	control	0.197707	0.022326
		day 3	shocked	0.113143	0.080547
		day 3	control	0.087715	0.037322
